# Supplementary material for: Organic aerosol source apportionment in Zurich using an extractive electrospray ionization time-of-flight mass spectrometer (EESI-TOF-MS) – Part 2: Biomass burning influences in winter
Source: Copernicus journal article supplement (doi:10.5194/acp-19-8037-2019), 2019-06-20
Supplement: Supplementary file 1 [file acp-19-8037-2019-supplement.pdf]

Supplement of Atmos. Chem. Phys., 19, 8037–8062, 2019  
<https://doi.org/10.5194/acp-19-8037-2019-supplement>  
© Author(s) 2019. This work is distributed under  
the Creative Commons Attribution 4.0 License.

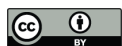

*Supplement of*

## **Organic aerosol source apportionment in Zurich using an extractive electrospray ionization time-of-flight mass spectrometer (EESI-TOF-MS) – Part 2: Biomass burning influences in winter**

**Lu Qi et al.**

*Correspondence to:* Jay G. Slowik ([jay.slowik@psi.ch](mailto:jay.slowik@psi.ch)) and André S. H. Prévôt ([andre.prevot@psi.ch](mailto:andre.prevot@psi.ch))

The copyright of individual parts of the supplement might differ from the CC BY 4.0 License.

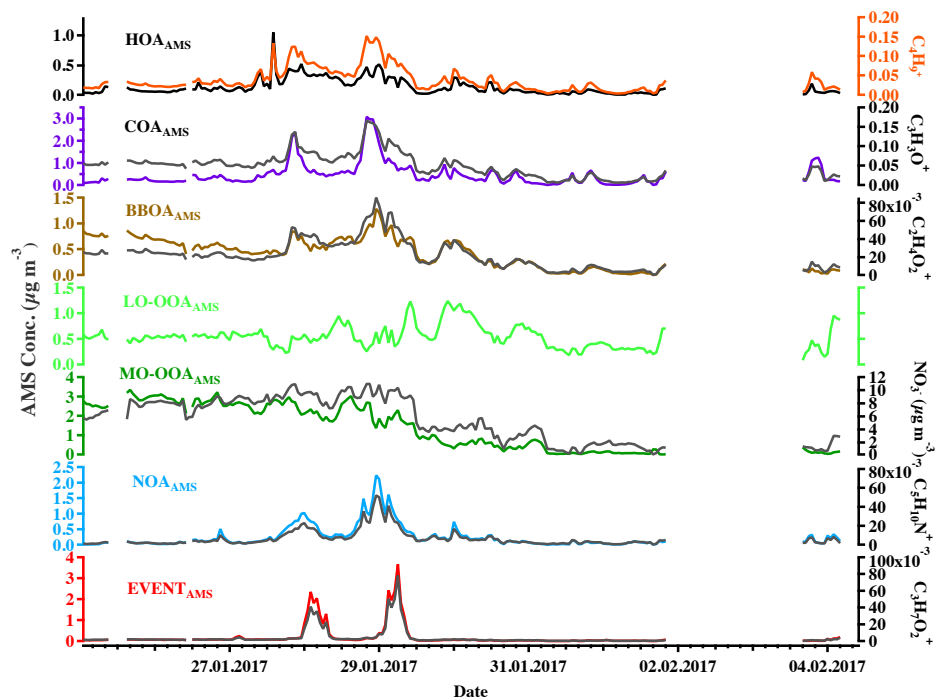

a)

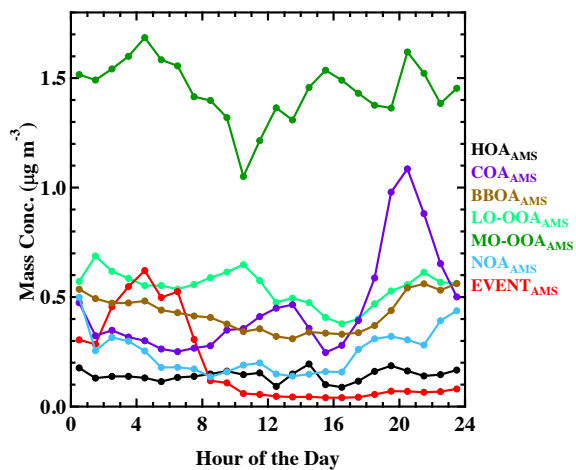

b)

Figure S1. a) Time-series of the AMS factors. b) Diurnal variations of the AMS factors.

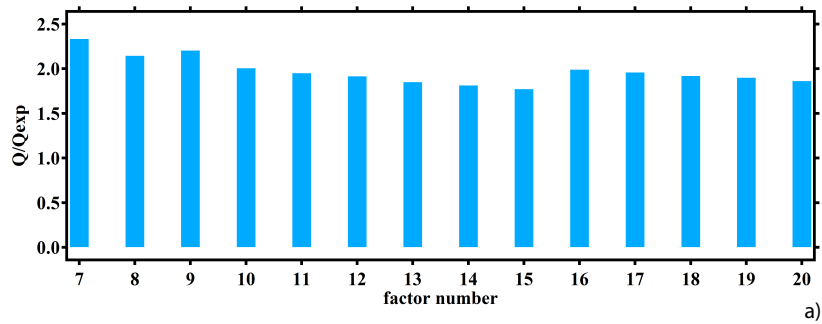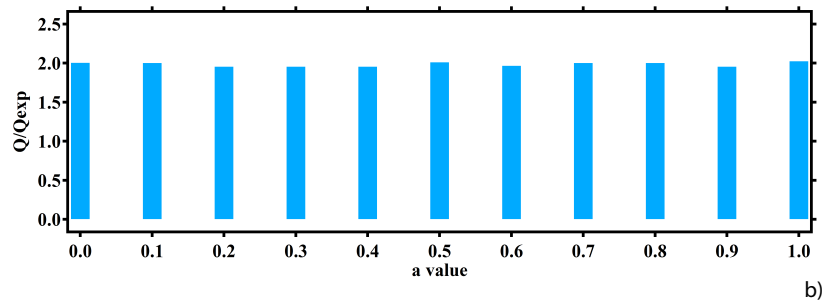

Figure S2. a)  $Q/Q_{exp}$  for the unconstrained solutions from 7 to 20 factors. b)  $Q/Q_{exp}$  for the set of the final 11-factor solutions (with CSOA constrained).

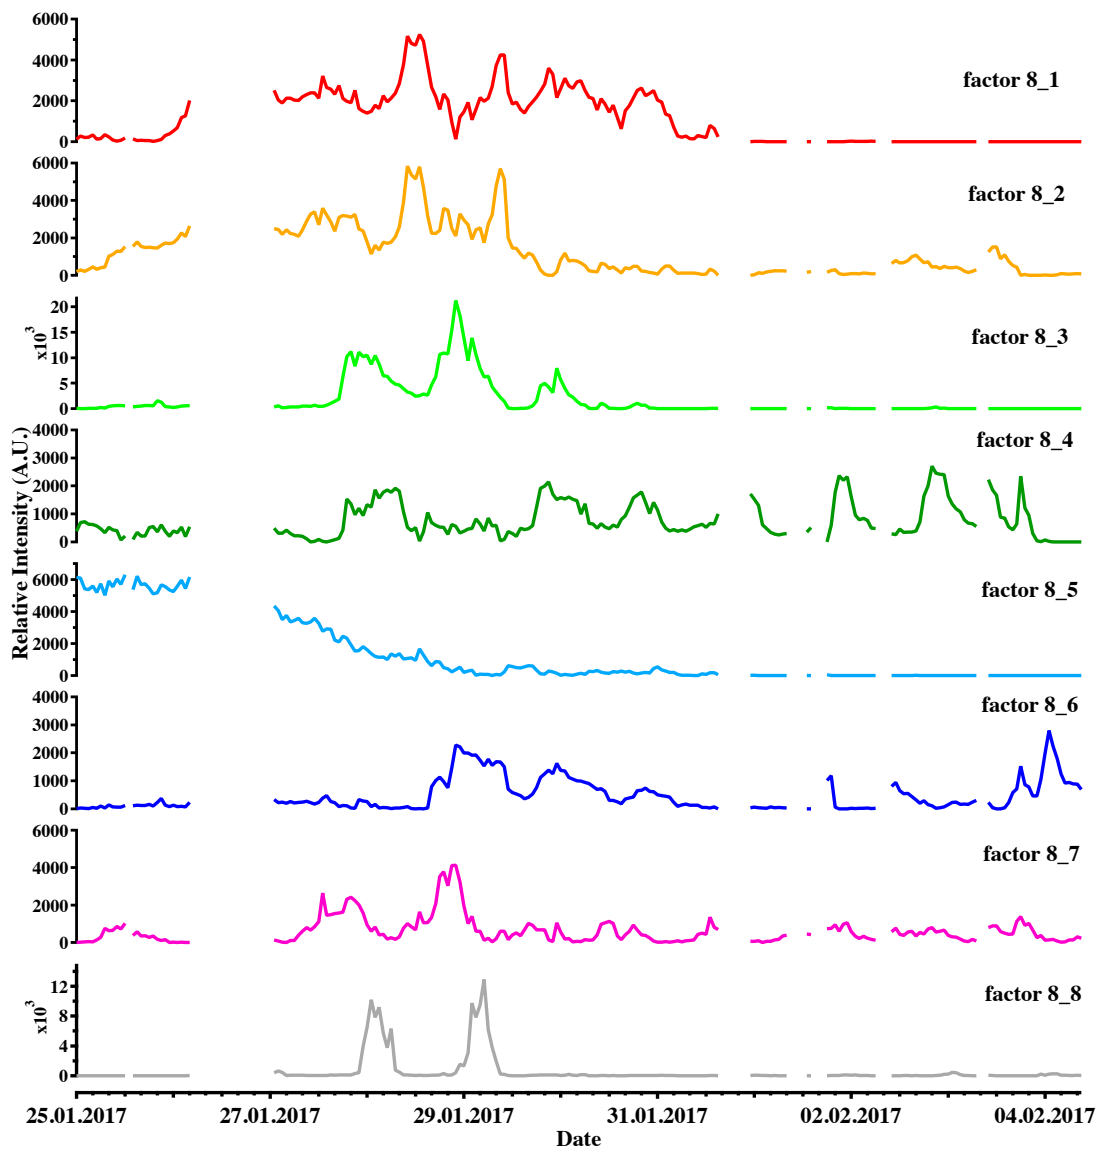

a)

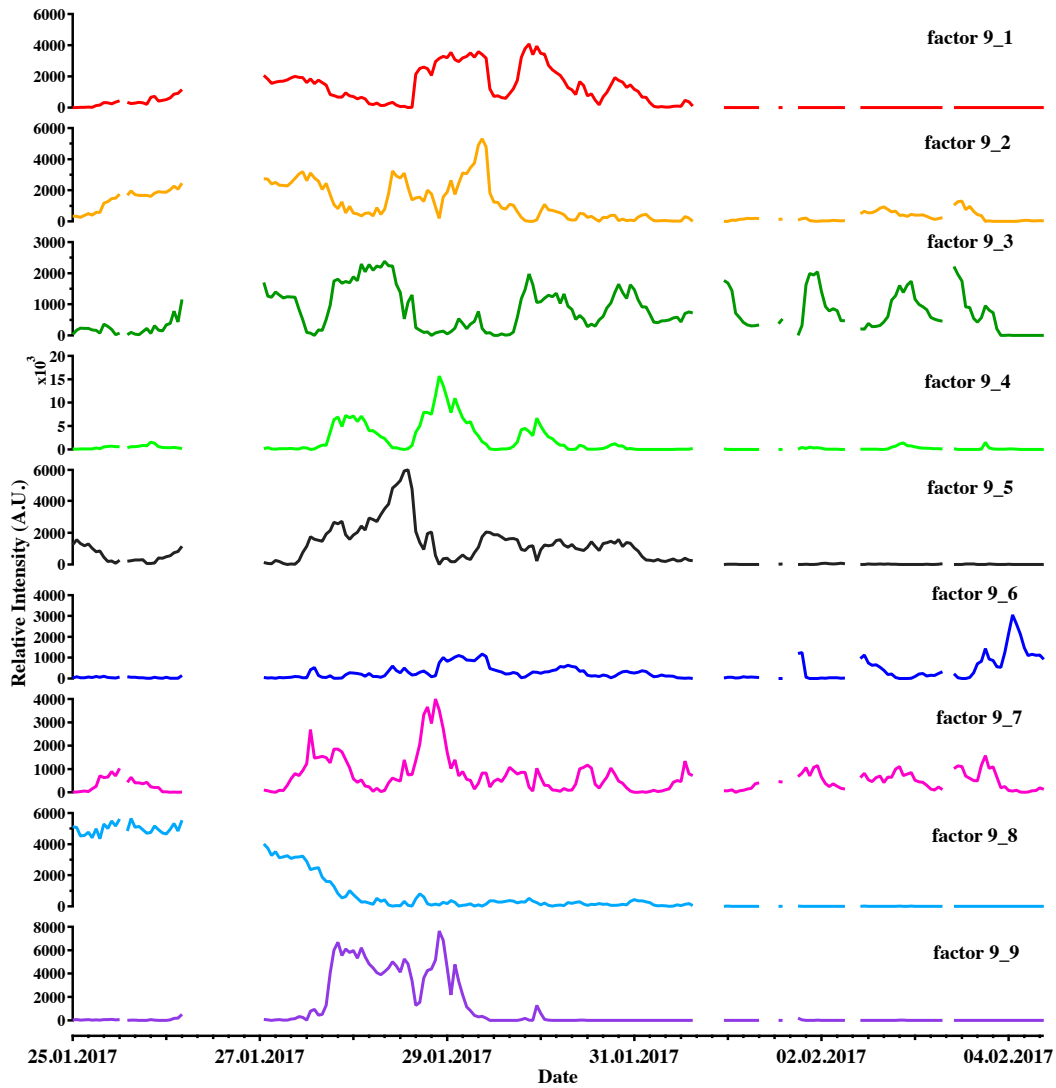

b)

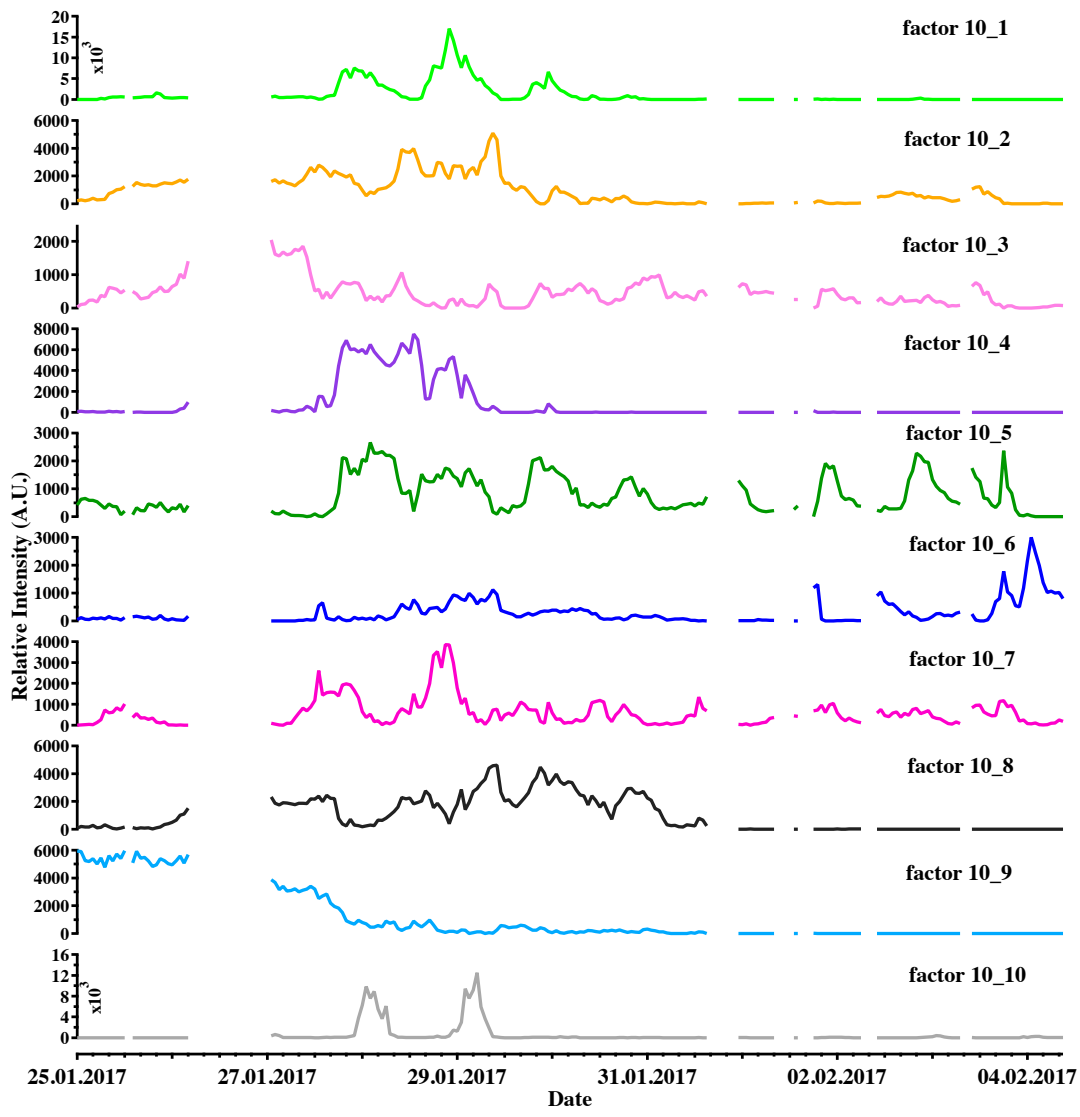

c)

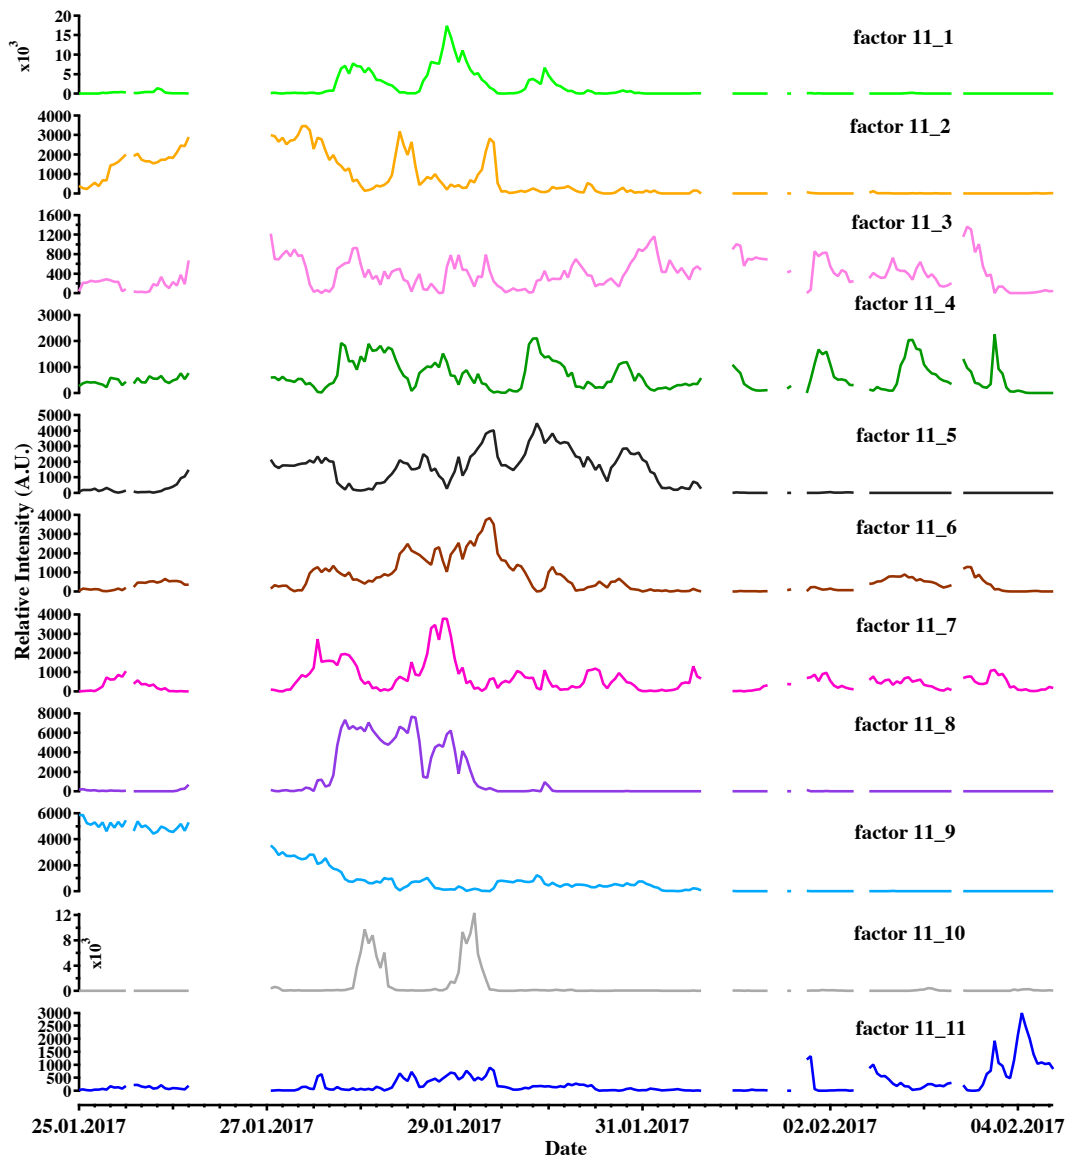

d)

Figure S3. Time series of solutions for 8 to 11 factors without constraining CSOA.

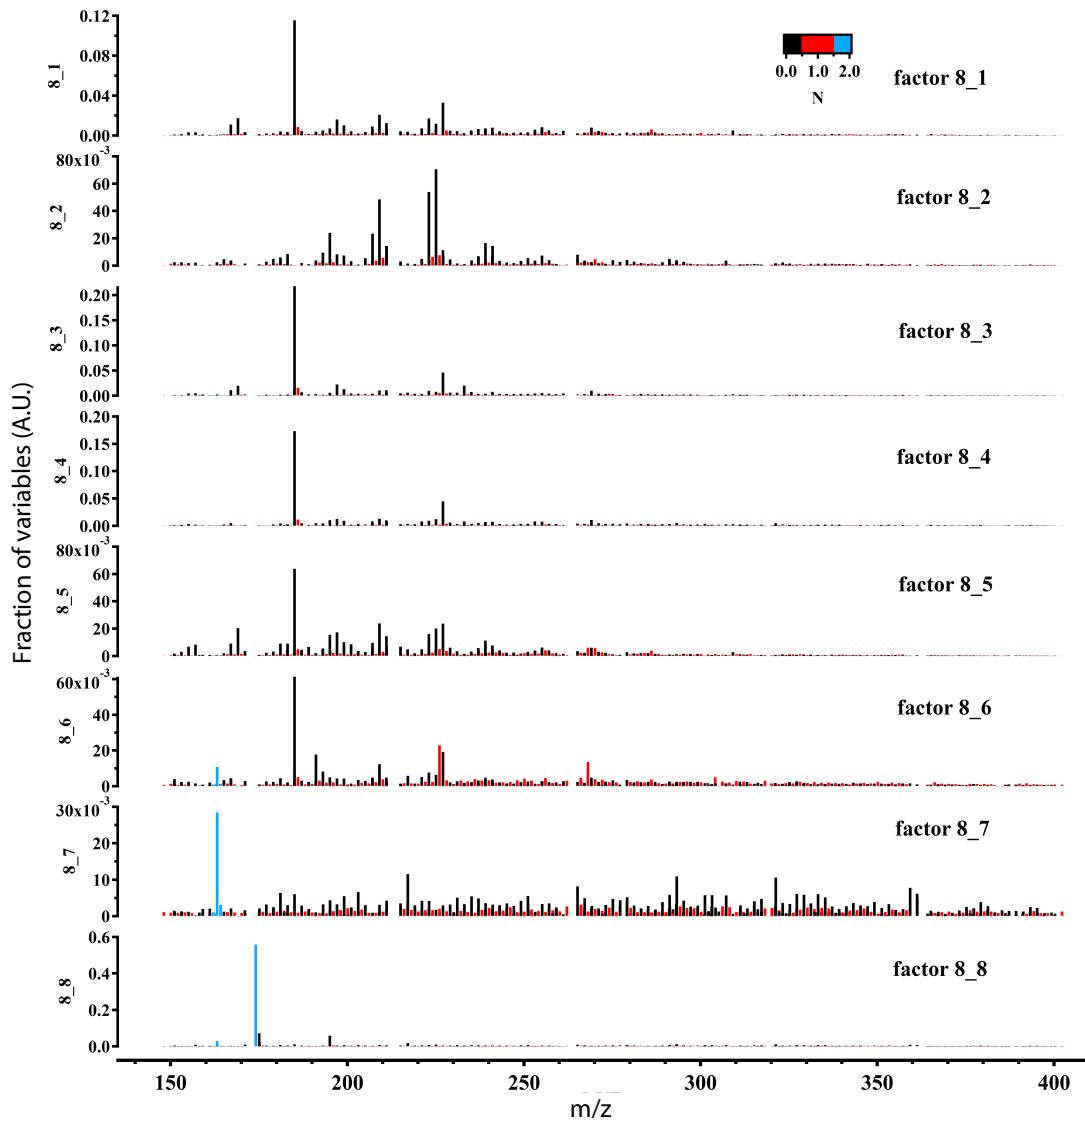

a)



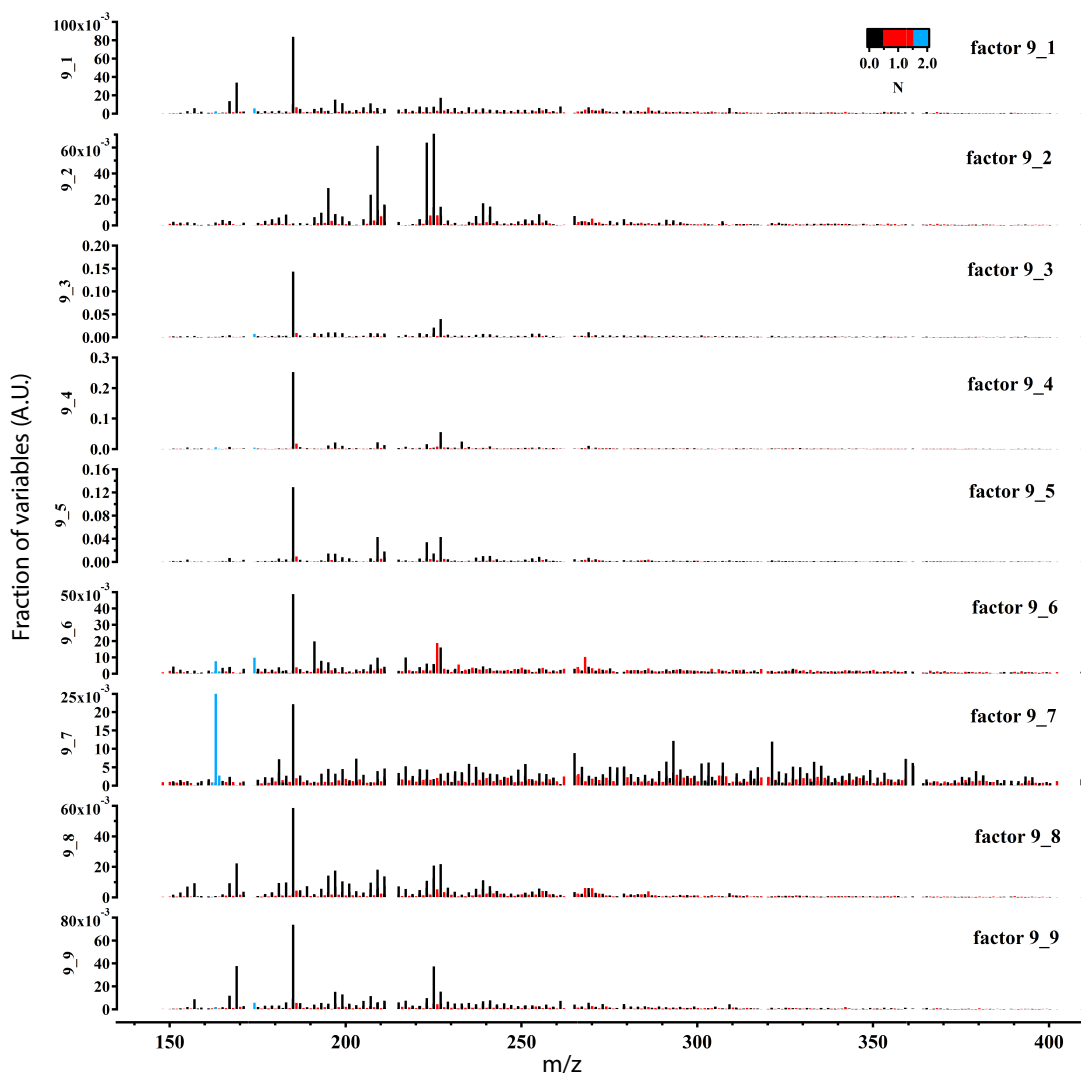

b)

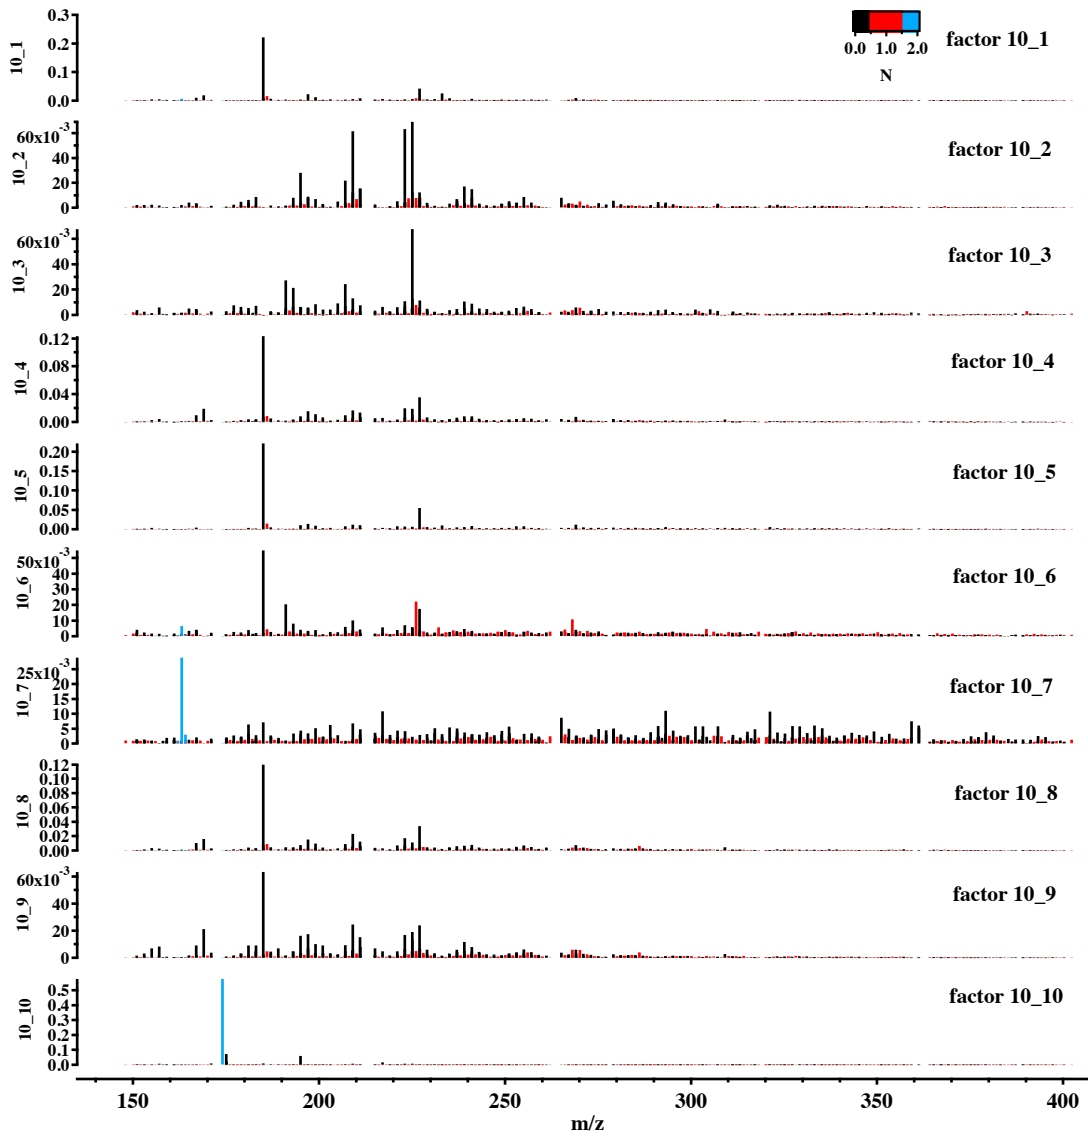

c)

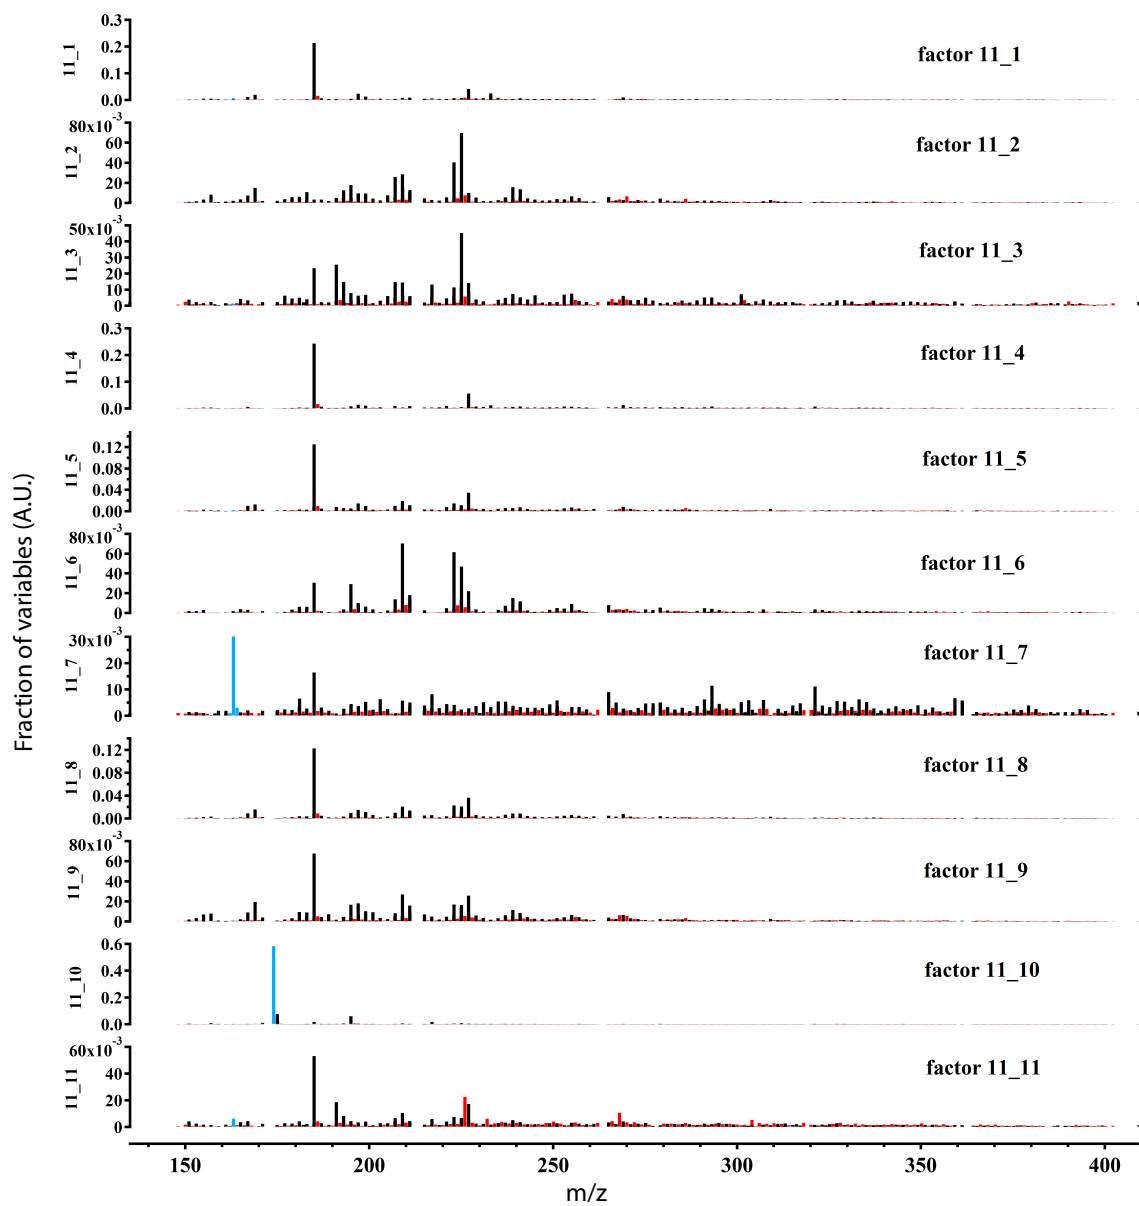

d)

Figure S4. Profiles of solutions for 8 to 11 factors without constraining CS-OA.

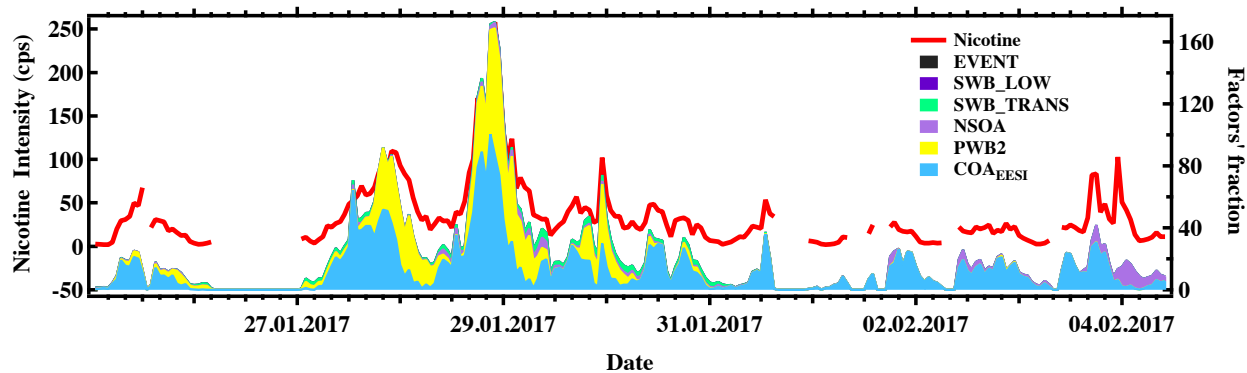

Figure S5. Comparison between time series of the intensity of nicotine and the contributions of the intensity of nicotine to each factor (10-factor solution).

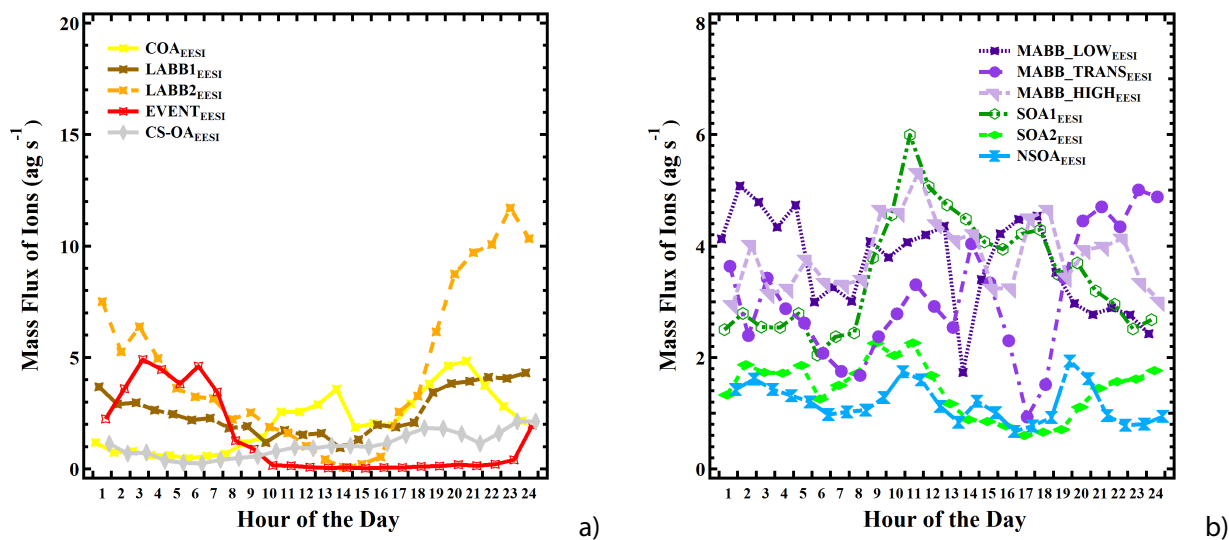

Figure S6. Diurnal variations of the EESI POA factors (a) and the EESI SOA factors (b).

Table S1. The O:C, H:C, and N:C values for the EESI and AMS factors (excluding the C<sub>6</sub>H<sub>10</sub>O<sub>5</sub> and C<sub>8</sub>H<sub>12</sub>O<sub>6</sub> ions).

|                 | O:C  | H:C  | N:C  |
|-----------------|------|------|------|
| <b>EESI-TOF</b> |      |      |      |
| LABB1           | 0.35 | 1.04 | 0.02 |
| MABB_LOW        | 0.50 | 1.39 | 0.02 |
| SOA1            | 0.42 | 1.61 | 0.02 |
| COA             | 0.30 | 1.56 | 0.02 |
| MABB_HIGH       | 0.45 | 1.26 | 0.02 |
| EVENT           | 0.23 | 1.44 | 0.15 |
| LABB2           | 0.37 | 1.09 | 0.02 |
| MABB_TRANS      | 0.43 | 1.28 | 0.02 |
| SOA2            | 0.43 | 1.54 | 0.02 |
| NSOA            | 0.39 | 1.41 | 0.04 |
| CS-OA           | 0.31 | 1.51 | 0.05 |
| <b>AMS</b>      |      |      |      |
| HOA             | 0.04 | 1.79 | 0.01 |
| OOA1            | 0.58 | 1.01 | 0.02 |
| OOA2            | 0.84 | 0.84 | 0.02 |
| EVENT           | 0.27 | 1.89 | 0.03 |
| COA             | 0.10 | 1.55 | 0.02 |
| NOA             | 0.43 | 1.33 | 0.05 |
| BBOA            | 0.39 | 1.49 | 0.04 |

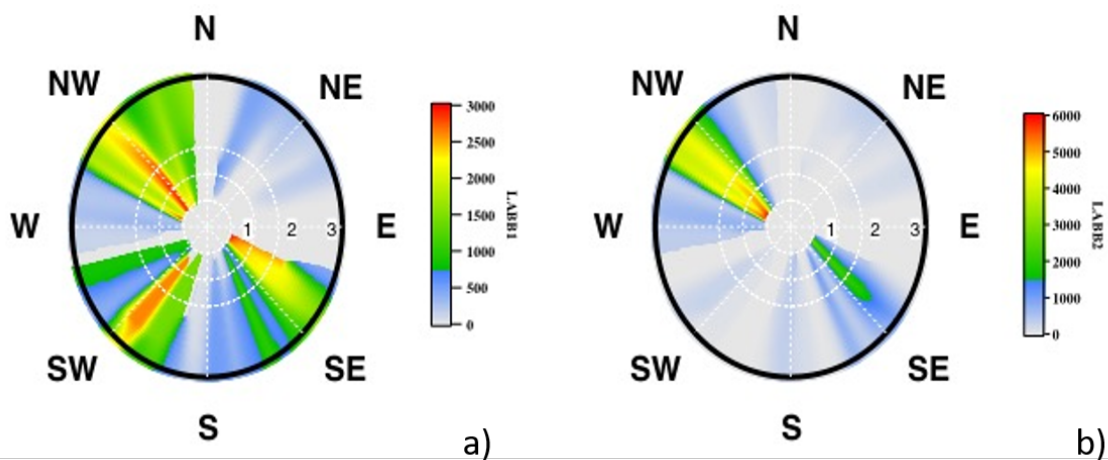

Figure S7. Wind analysis results using the SWIM model on the concentrations of LABB1 (a) and LABB2 (b).

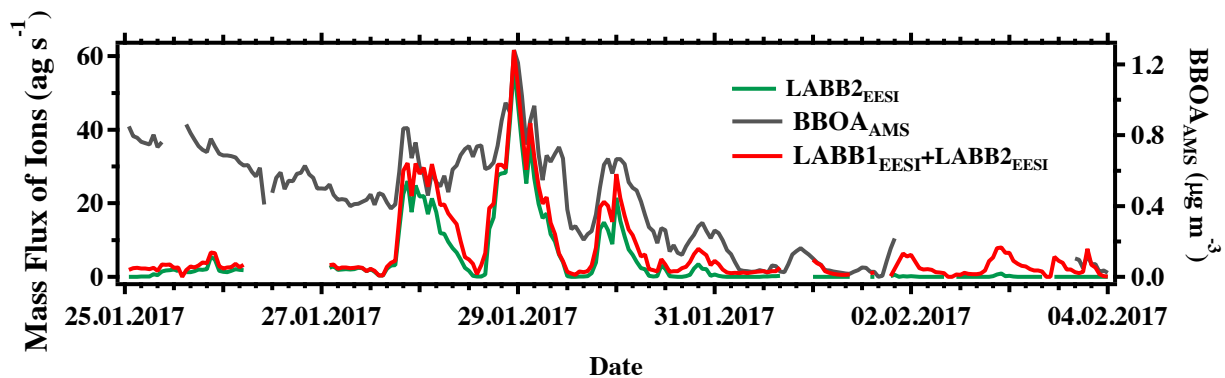

Figure S8. Comparison between the LABB<sub>EESI</sub> factors and the WBOA<sub>AMS</sub> factor.

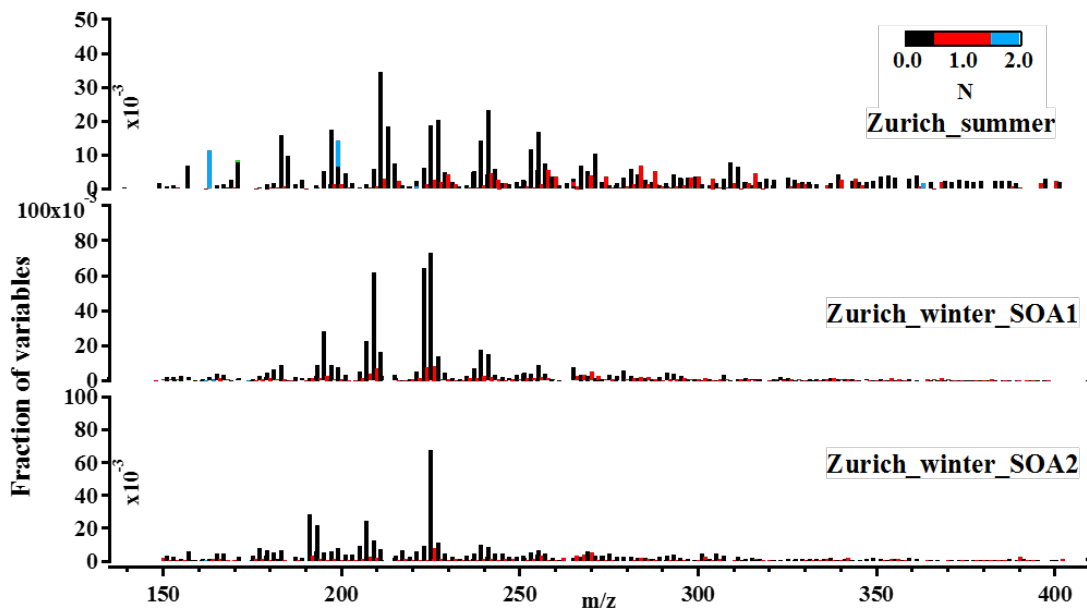

Figure S9. Mass spectra comparison between SOA factors and reference mass spectra from Zurich summer source apportionment (Stefenelli et al., 2019).

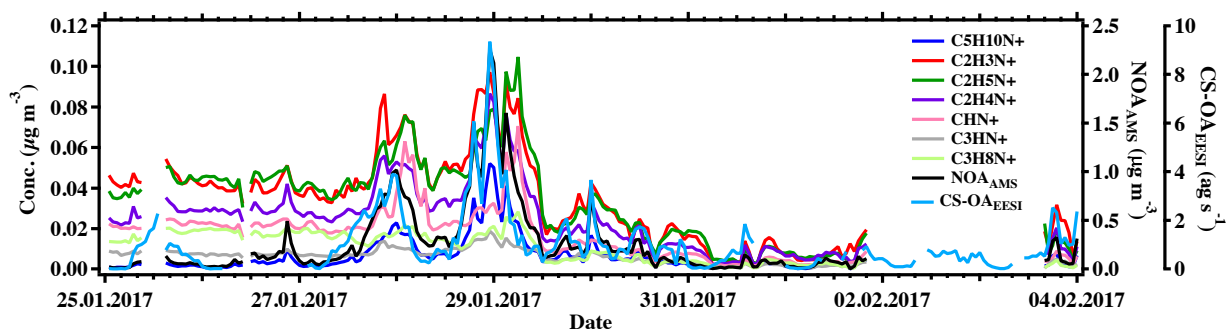

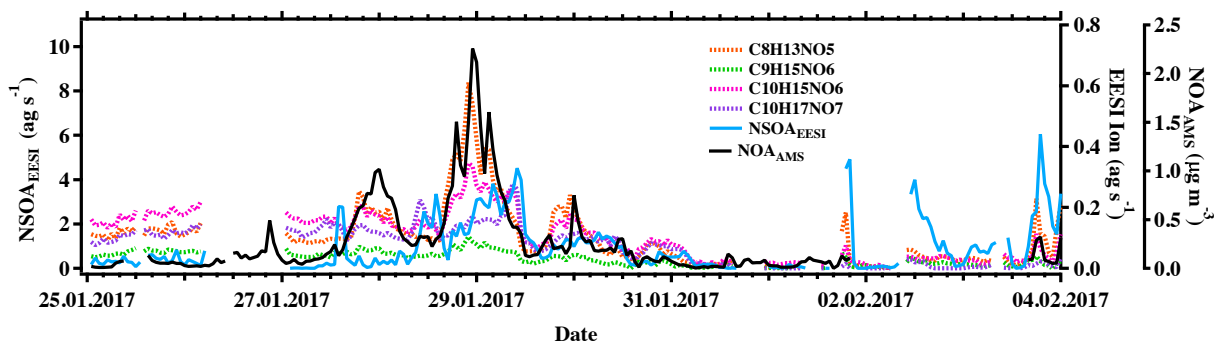

Figure S10. Time series of fragments group of AMS CHON and AMS CHN compared to the time series of NSOA<sub>EESI</sub> factor and CS-OA<sub>EESI</sub> factor, respectively.



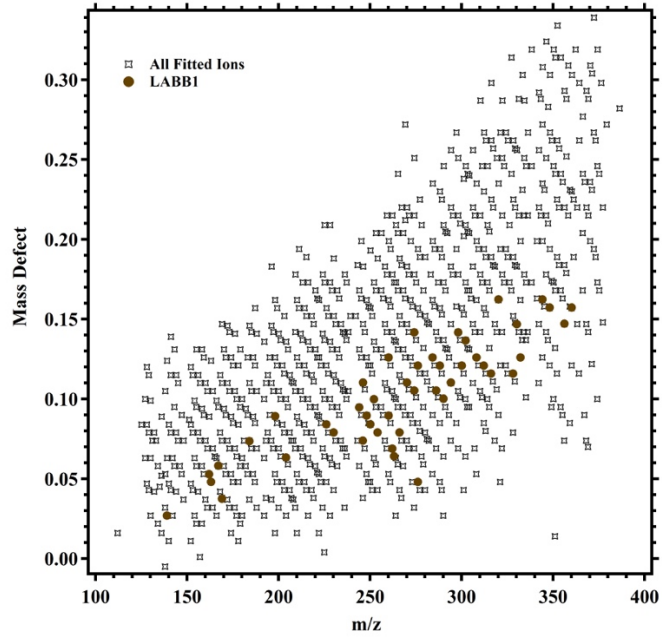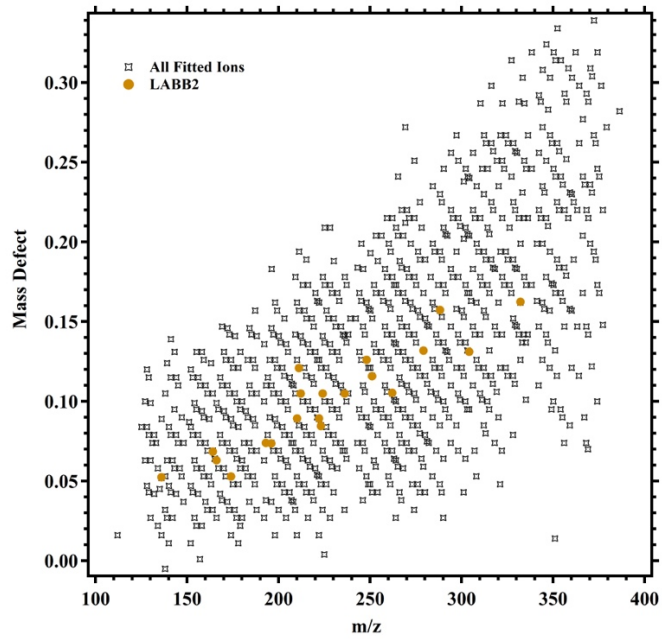

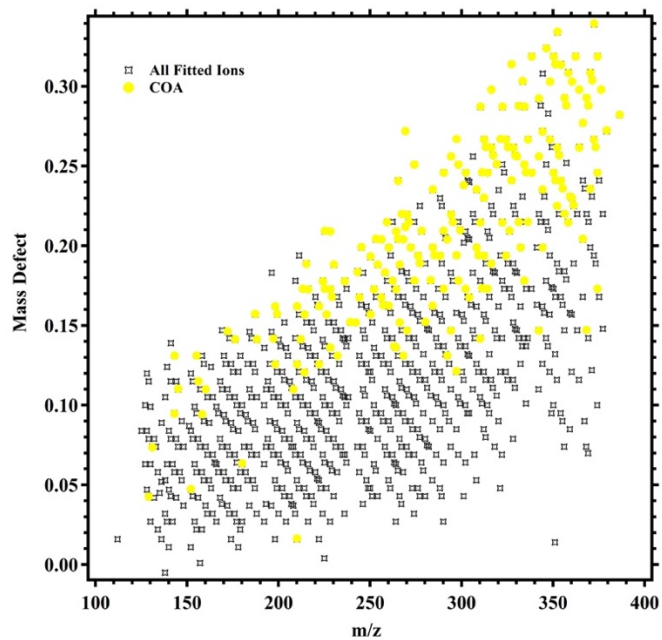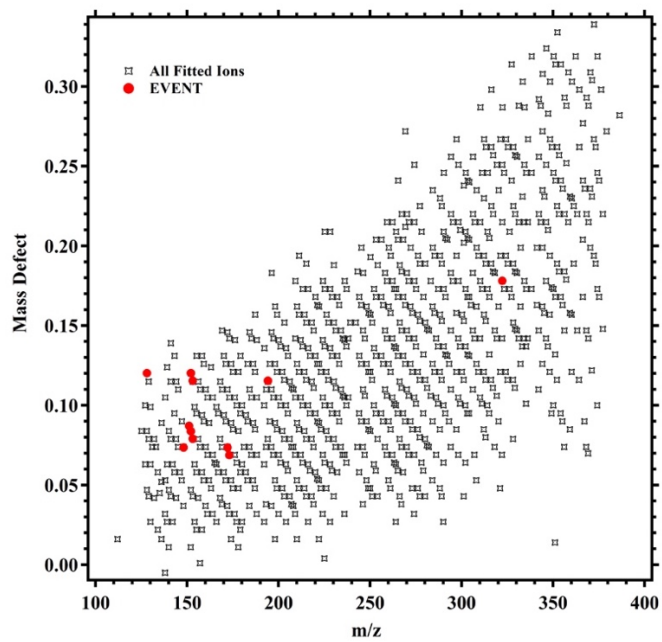

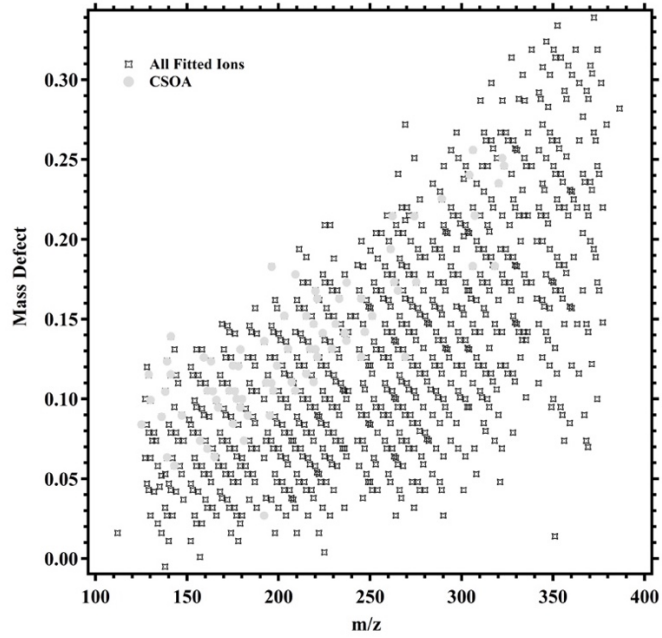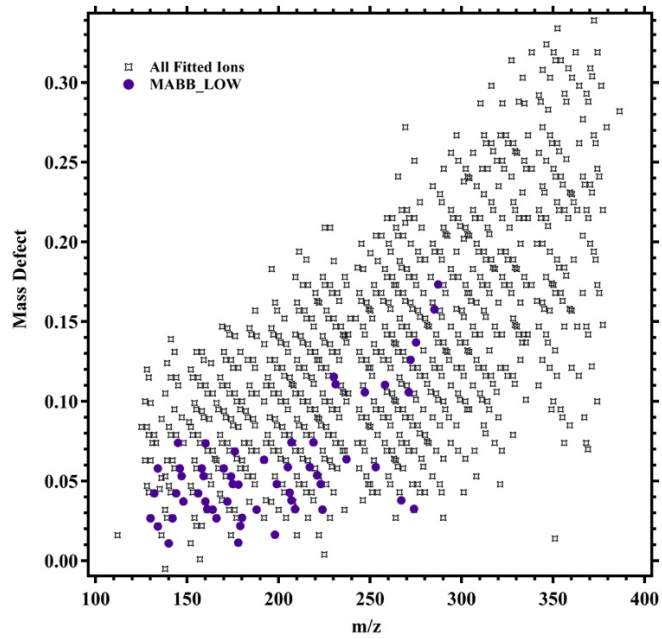

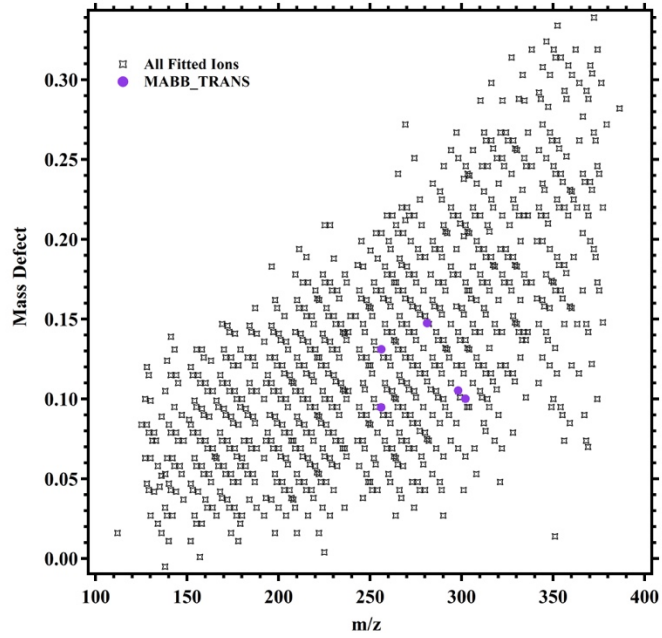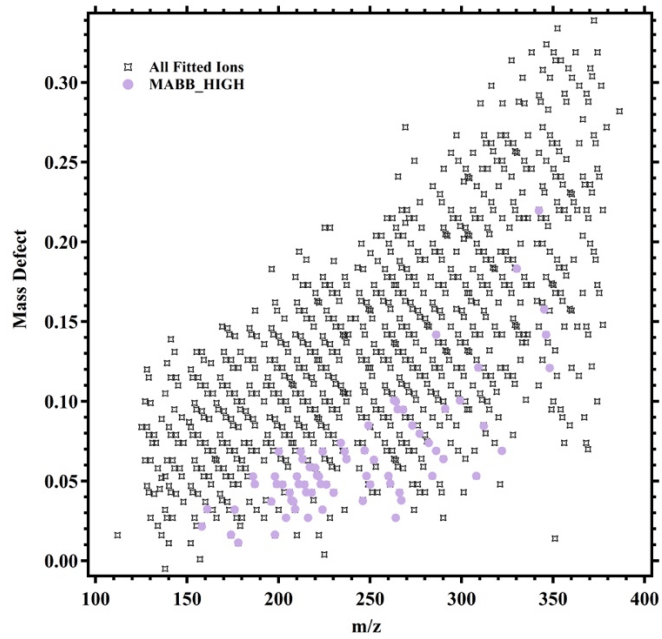

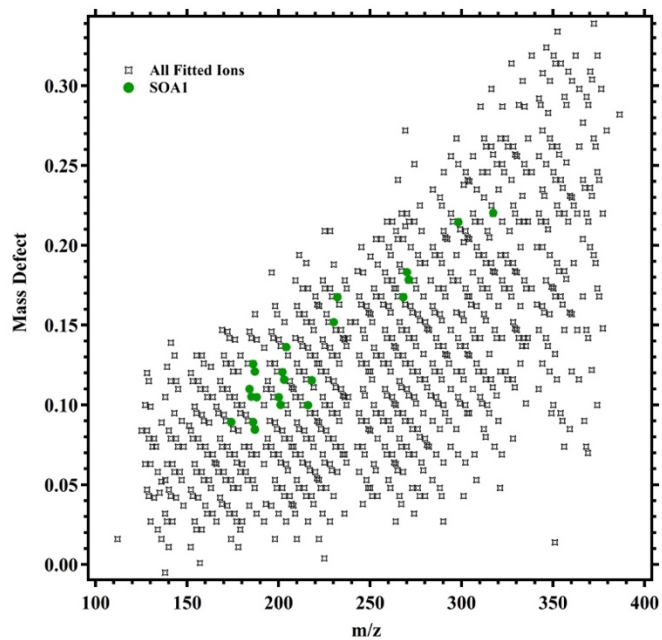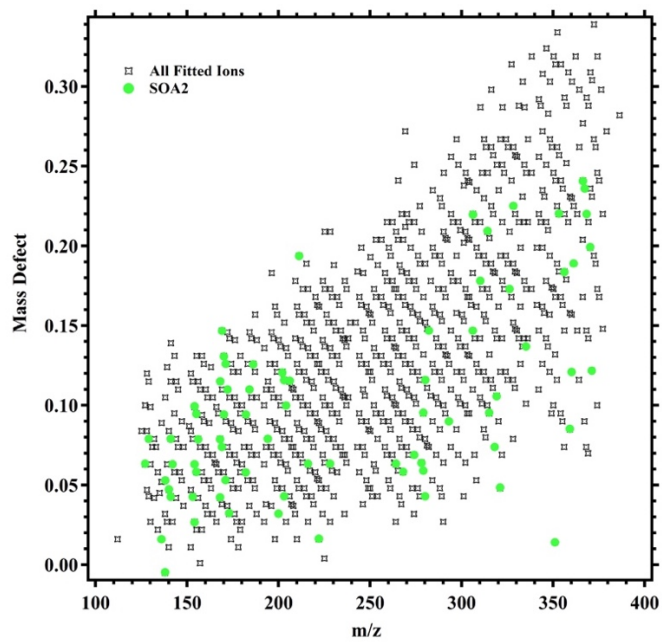

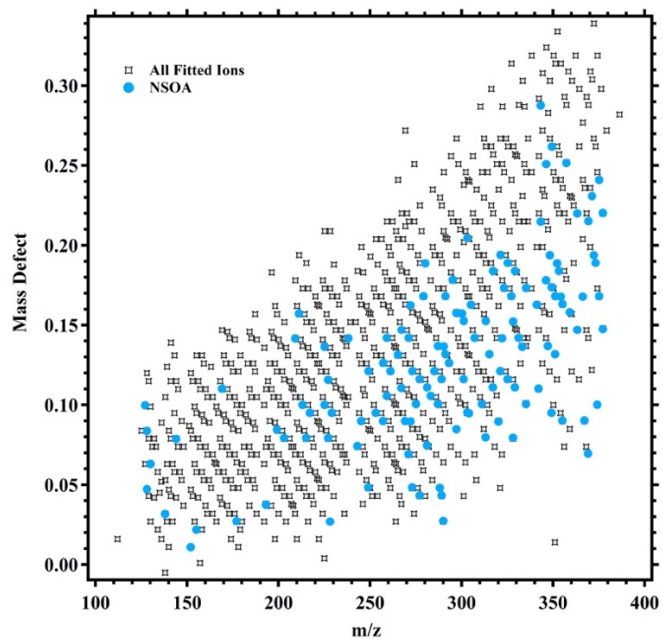

Figure S11. Mass defect plots for each factor, with the unique ions marked in colors.

**Table S2. Tentative formula assignment of MS peaks with  $m/z$  values for cluster groups.**

| Factor Name | Ion formula | Measured $m/z$ |
|-------------|-------------|----------------|
| COA         |             |                |
|             | C5H4O3      | 135.006        |
|             | C5H7NO3     | 152.033        |
|             | C9H9N       | 154.064        |
|             | C7H13NO2    | 166.085        |
|             | C8H17NO     | 166.121        |
|             | C7H15NO2    | 168.1          |
|             | C8H8O3      | 175.037        |
|             | C9H17NO     | 178.121        |
|             | C9H16O2     | 179.105        |
|             | C8H14O3     | 181.084        |
|             | C8H16O3     | 183.1          |
|             | C10H20O2    | 195.136        |
|             | C9H19NO2    | 196.132        |
|             | C9H20O3     | 199.131        |
|             | C6H12O6     | 203.053        |
|             | C11H20O2    | 207.136        |
|             | C10H19NO2   | 208.132        |
|             | C10H21NO2   | 210.147        |
|             | C10H20O3    | 211.131        |
|             | C11H19NO2   | 220.132        |
|             | C11H18O3    | 221.116        |
|             | C12H22O2    | 221.152        |
|             | C11H21NO2   | 222.147        |
|             | C11H20O3    | 223.131        |
|             | C12H16O3    | 231.1          |
|             | C9H6O6      | 233.006        |
|             | C12H18O3    | 233.116        |
|             | C13H22O2    | 233.152        |
|             | C12H20O3    | 235.131        |
| C12H23NO2   | 236.163     |                |
| C11H18O4    | 237.111     |                |

|           |         |
|-----------|---------|
| C12H22O3  | 237.147 |
| C12H25NO2 | 238.179 |
| C12H24O3  | 239.163 |
| C13H18O3  | 245.116 |
| C14H22O2  | 245.152 |
| C14H24O2  | 247.168 |
| C13H23NO2 | 248.163 |
| C14H27NO  | 248.199 |
| C13H22O3  | 249.147 |
| C12H20O4  | 251.126 |
| C13H24O3  | 251.163 |
| C14H28O2  | 251.199 |
| C12H23NO3 | 252.158 |
| C13H26O3  | 253.178 |
| C11H20O5  | 255.121 |
| C15H24O2  | 259.168 |
| C13H21NO3 | 262.142 |
| C13H22O4  | 265.142 |
| C13H25NO3 | 266.174 |
| C13H24O4  | 267.158 |
| C13H27NO3 | 268.189 |
| C15H22O3  | 273.147 |
| C16H26O2  | 273.183 |
| C15H24O3  | 275.163 |
| C15H27NO2 | 276.194 |
| C15H26O3  | 277.178 |
| C14H24O4  | 279.158 |
| C15H28O3  | 279.194 |
| C13H23NO4 | 280.153 |
| C14H26O4  | 281.173 |
| C14H29NO3 | 282.205 |
| C13H24O5  | 283.152 |
| C14H28O4  | 283.189 |

|           |         |
|-----------|---------|
| C13H26O5  | 285.168 |
| C11H21NO6 | 286.127 |
| C15H20O4  | 287.126 |
| C16H24O3  | 287.163 |
| C17H28O2  | 287.199 |
| C16H27NO2 | 288.194 |
| C17H31NO  | 288.231 |
| C15H22O4  | 289.142 |
| C16H26O3  | 289.178 |
| C16H29NO2 | 290.21  |
| C14H20O5  | 291.121 |
| C16H28O3  | 291.194 |
| C16H29O3  | 292.202 |
| C17H35NO  | 292.262 |
| C14H22O5  | 293.137 |
| C16H30O3  | 293.21  |
| C15H29NO3 | 294.205 |
| C15H28O4  | 295.189 |
| C14H26O5  | 297.168 |
| C16H34O3  | 297.241 |
| C14H28O5  | 299.184 |
| C13H27NO5 | 300.179 |
| C14H30O5  | 301.199 |
| C12H24O7  | 303.142 |
| C15H25NO4 | 306.168 |
| C15H24O5  | 307.152 |
| C16H28O4  | 307.189 |
| C17H32O3  | 307.225 |
| C15H27NO4 | 308.184 |
| C15H28O5  | 311.184 |
| C14H26O6  | 313.163 |
| C15H30O5  | 313.199 |
| C16H34O4  | 313.236 |
| C16H20O5  | 315.121 |

|           |         |
|-----------|---------|
| C18H28O3  | 315.194 |
| C16H22O5  | 317.137 |
| C18H30O3  | 317.21  |
| C19H34O2  | 317.246 |
| C17H29NO3 | 318.205 |
| C14H19NO6 | 320.111 |
| C16H27NO4 | 320.184 |
| C18H35NO2 | 320.257 |
| C16H26O5  | 321.168 |
| C18H34O3  | 321.241 |
| C16H29NO4 | 322.2   |
| C17H33O4  | 324.228 |
| C15H26O6  | 325.163 |
| C17H34O4  | 325.236 |
| C18H24O4  | 327.158 |
| C18H28O4  | 331.189 |
| C19H32O3  | 331.225 |
| C17H27NO4 | 332.184 |
| C16H22O6  | 333.132 |
| C18H30O4  | 333.205 |
| C20H38O2  | 333.277 |
| C16H25NO5 | 334.163 |
| C18H33NO3 | 334.236 |
| C17H28O5  | 335.184 |
| C18H32O4  | 335.22  |
| C19H36O3  | 335.257 |
| C18H35NO3 | 336.252 |
| C16H26O6  | 337.163 |
| C18H34O4  | 337.236 |
| C16H28O6  | 339.179 |
| C18H36O4  | 339.252 |
| C19H40O3  | 339.288 |
| C17H35NO4 | 340.247 |
| C20H33NO2 | 342.241 |



|           |         |
|-----------|---------|
| C20H35NO2 | 344.257 |
| C19H30O4  | 345.205 |
| C21H38O2  | 345.277 |
| C18H28O5  | 347.184 |
| C20H36O3  | 347.257 |
| C19H35NO3 | 348.252 |
| C18H30O5  | 349.199 |
| C18H33NO4 | 350.231 |
| C20H41NO2 | 350.304 |
| C19H36O4  | 351.252 |
| C18H35NO4 | 352.247 |
| C22H34O2  | 353.246 |
| C20H29NO3 | 354.205 |
| C22H37NO  | 354.278 |
| C20H28O4  | 355.189 |
| C22H39NO  | 356.293 |
| C19H26O5  | 357.168 |
| C21H34O3  | 357.241 |
| C22H38O2  | 357.277 |
| C20H33NO3 | 358.236 |
| C16H32O7  | 359.205 |
| C21H36O3  | 359.257 |
| C20H34O4  | 361.236 |
| C22H42O2  | 361.309 |
| C20H22O5  | 365.137 |
| C23H34O2  | 365.246 |
| C24H38O   | 365.282 |
| C21H28O4  | 367.189 |
| C22H32O3  | 367.225 |
| C23H36O2  | 367.262 |
| C24H42O   | 369.314 |
| C22H36O3  | 371.257 |
| C23H40O2  | 371.293 |
| C21H34O4  | 373.236 |

|           |         |
|-----------|---------|
| C23H42O2  | 373.309 |
| C20H33NO4 | 374.231 |
| C22H41NO2 | 374.304 |
| C20H32O5  | 375.215 |
| C21H36O4  | 375.252 |
| C23H44O2  | 375.324 |
| C20H35NO4 | 376.247 |
| C20H34O5  | 377.231 |
| C22H42O3  | 377.304 |
| C19H33NO5 | 378.226 |
| C19H32O6  | 379.21  |
| C21H40O4  | 379.283 |
| C20H39NO4 | 380.278 |
| C22H30O4  | 381.205 |
| C21H42O4  | 381.299 |
| C18H33NO6 | 382.221 |
| C22H32O4  | 383.22  |
| C24H40O2  | 383.293 |
| C21H31NO4 | 384.215 |
| C24H42O2  | 385.309 |
| C22H36O4  | 387.252 |
| C23H40O3  | 387.288 |
| C20H30O6  | 389.194 |
| C22H38O4  | 389.267 |
| C18H24O8  | 391.137 |
| C22H40O4  | 391.283 |
| C21H39NO4 | 392.278 |
| C20H34O6  | 393.226 |
| C22H42O4  | 393.299 |
| C21H41NO4 | 394.294 |
| C24H36O3  | 395.257 |
| C26H44O   | 395.329 |
| C23H35NO3 | 396.252 |
| C21H26O6  | 397.163 |

|              |           |         |              |           |         |
|--------------|-----------|---------|--------------|-----------|---------|
|              | C23H34O4  | 397.236 |              | C15H20O7  | 335.111 |
|              | C25H42O2  | 397.309 |              | C14H20O8  | 339.106 |
|              | C24H40O3  | 399.288 |              | C18H24O5  | 343.152 |
|              | C22H37NO4 | 402.262 |              | C15H20O8  | 351.106 |
|              | C25H38O3  | 409.272 |              | C19H22O5  | 353.137 |
| <b>LABB1</b> |           |         |              | C18H20O6  | 355.116 |
|              | C6H5NO3   | 162.017 |              | C20H24O5  | 367.152 |
|              | C6H10O5   | 185.043 |              | C19H24O6  | 371.147 |
|              | C5H9NO5   | 186.038 |              | C17H24O8  | 379.137 |
|              | C8H9NO3   | 190.048 |              | C20H24O6  | 383.147 |
|              | C7H7NO4   | 192.028 | <b>LABB2</b> |           |         |
|              | C9H12O4   | 207.064 |              | C8H8O2    | 159.042 |
|              | C10H14O4  | 221.079 |              | C6H12O5   | 187.059 |
|              | C8H12O6   | 227.053 |              | C9H10O3   | 189.053 |
|              | C10H14O6  | 253.069 |              | C10H11NO3 | 216.064 |
|              | C13H14O5  | 273.074 |              | C10H12O4  | 219.064 |
|              | C13H16O5  | 275.09  |              | C11H14O4  | 233.079 |
|              | C10H14O8  | 285.059 |              | C11H17NO3 | 234.111 |
|              | C9H13NO8  | 286.054 |              | C11H16O4  | 235.095 |
|              | C13H14O6  | 289.069 |              | C12H14O4  | 245.079 |
|              | C13H18O6  | 293.1   |              | C11H13NO4 | 246.075 |
|              | C12H18O7  | 297.095 |              | C12H16O4  | 247.095 |
|              | C13H22O6  | 297.132 |              | C13H16O4  | 259.095 |
|              | C10H12O9  | 299.038 |              | C11H20O6  | 271.116 |
|              | C12H20O7  | 299.111 |              | C13H17NO4 | 274.106 |
|              | C14H20O6  | 307.116 |              | C11H18O7  | 285.095 |
|              | C13H18O7  | 309.095 |              | C11H21NO7 | 302.122 |
|              | C13H20O7  | 311.111 |              | C14H24O6  | 311.147 |
|              | C12H18O8  | 313.09  |              | C17H20O5  | 327.121 |
|              | C15H18O6  | 317.1   |              | C19H24O5  | 355.152 |
|              | C15H22O6  | 321.132 | <b>EVENT</b> |           |         |
|              | C14H20O7  | 323.111 |              | C8H16O    | 151.11  |
|              | C14H22O7  | 325.127 |              | C6H12O4   | 171.064 |
|              | C16H20O6  | 331.116 |              | C8H11N2O  | 174.077 |

|              |           |         |
|--------------|-----------|---------|
|              | C9H12O2   | 175.074 |
|              | C10H16O   | 175.11  |
|              | C8H11NO2  | 176.069 |
|              | C9H15NO   | 176.105 |
|              | C8H12O4   | 195.064 |
|              | C7H11NO4  | 196.059 |
|              | C8H18O5   | 217.105 |
|              | C11H17NO2 | 218.116 |
|              | C18H26O5  | 345.168 |
| <b>CS-OA</b> |           |         |
|              | C7H11NO   | 148.074 |
|              | C7H15NO   | 152.105 |
|              | C7H14O2   | 153.089 |
|              | C9H12O    | 159.079 |
|              | C9H14O    | 161.095 |
|              | C7H9NO2   | 162.053 |
|              | C8H15N2   | 162.114 |
|              | C8H15NO   | 164.105 |
|              | C8H17N2   | 164.129 |
|              | C6H9NO3   | 166.048 |
|              | C6H13NO3  | 170.08  |
|              | C7H11NO3  | 180.064 |
|              | C8H17NO2  | 182.116 |
|              | C6H11NO4  | 184.059 |
|              | C7H15NO3  | 184.095 |
|              | C10H14N2  | 163.124 |
|              | C7H16O4   | 187.095 |
|              | C5H11NO5  | 188.054 |
|              | C10H14O2  | 189.089 |
|              | C9H13NO2  | 190.085 |
|              | C8H15NO3  | 196.095 |
|              | C7H13NO4  | 198.075 |
|              | C8H17NO3  | 198.111 |
|              | C8H16O4   | 199.095 |

|  |           |         |
|--|-----------|---------|
|  | C7H15NO4  | 200.09  |
|  | C8H18O4   | 201.111 |
|  | C10H13NO2 | 202.085 |
|  | C11H17NO  | 202.121 |
|  | C7H16O5   | 203.09  |
|  | C9H11NO3  | 204.064 |
|  | C9H13NO3  | 206.08  |
|  | C6H8O7    | 215.017 |
|  | C9H20O4   | 215.126 |
|  | C11H15NO2 | 216.1   |
|  | C10H13NO3 | 218.08  |
|  | C11H16O3  | 219.1   |
|  | C13H24O   | 219.173 |
|  | C10H15NO3 | 220.095 |
|  | C10H17NO3 | 222.111 |
|  | C10H21NO3 | 226.142 |
|  | C9H19NO4  | 228.121 |
|  | C8H17NO5  | 230.101 |
|  | C11H15NO3 | 232.095 |
|  | C13H23NO  | 232.168 |
|  | C11H21NO3 | 238.142 |
|  | C10H19NO4 | 240.121 |
|  | C9H17NO5  | 242.101 |
|  | C10H21NO4 | 242.137 |
|  | C10H20O5  | 243.121 |
|  | C11H24O4  | 243.158 |
|  | C9H19NO5  | 244.116 |
|  | C10H23NO4 | 244.153 |
|  | C13H20O3  | 247.131 |
|  | C11H21NO4 | 254.137 |
|  | C11H23NO4 | 256.153 |
|  | C14H20O3  | 259.131 |
|  | C13H19NO3 | 260.127 |
|  | C14H23NO2 | 260.163 |

|                 |         |
|-----------------|---------|
| C12H23NO4       | 268.153 |
| C11H21NO5       | 270.132 |
| C14H21NO3       | 274.142 |
| C13H27NO4       | 284.184 |
| C14H30O4        | 285.205 |
| C12H25NO5       | 286.163 |
| C15H23NO3       | 288.158 |
| C13H19NO5       | 292.116 |
| C15H30O4        | 297.205 |
| C13H25NO5       | 298.163 |
| C15H31NO4       | 312.215 |
| C20H32O2        | 327.23  |
| C18H26O4        | 329.173 |
| C20H34O2        | 329.246 |
| C18H29NO3       | 330.205 |
| C19H26O4        | 341.173 |
| C20H32O3        | 343.225 |
| C20H34O3        | 345.241 |
| C19H33NO3       | 346.236 |
| <b>MABB_LOW</b> |         |
| C5H6O4          | 153.017 |
| C5H8O4          | 155.032 |
| C4H6O5          | 157.012 |
| C5H10O4         | 157.048 |
| C6H4O4          | 163.001 |
| C6H6O4          | 165.017 |
| C6H8O4          | 167.032 |
| C6H11NO3        | 168.064 |
| C6H10O4         | 169.048 |
| C5H9NO4         | 170.043 |
| C5H8O5          | 171.027 |
| C7H8O4          | 179.032 |
| C7H10O4         | 181.048 |
| C6H9NO4         | 182.043 |

|           |         |
|-----------|---------|
| C6H8O5    | 183.027 |
| C7H12O4   | 183.064 |
| C5H7NO5   | 184.022 |
| C5H8O6    | 187.022 |
| C8H6O4    | 189.017 |
| C8H10O4   | 193.048 |
| C7H8O5    | 195.027 |
| C7H10O5   | 197.043 |
| C6H9NO5   | 198.038 |
| C7H12O5   | 199.059 |
| C5H6O7    | 201.001 |
| C6H10O6   | 201.038 |
| C8H5NO4   | 202.012 |
| C5H8O7    | 203.017 |
| C7H8O6    | 211.022 |
| C7H12O6   | 215.053 |
| C8H6O6    | 221.006 |
| C8H9NO5   | 222.038 |
| C7H11NO6  | 228.049 |
| C7H10O7   | 229.033 |
| C6H9NO7   | 230.028 |
| C7H13NO6  | 230.064 |
| C9H7NO5   | 232.022 |
| C8H11NO6  | 240.049 |
| C8H13NO6  | 242.064 |
| C7H11NO7  | 244.044 |
| C10H9NO5  | 246.038 |
| C10H8O6   | 247.022 |
| C11H18O5  | 253.105 |
| C10H17NO5 | 254.101 |
| C11H11NO5 | 260.054 |
| C10H17NO6 | 270.096 |
| C11H11NO6 | 276.049 |
| C12H18O6  | 281.1   |

|                   |           |         |
|-------------------|-----------|---------|
|                   | C11H9NO7  | 290.028 |
|                   | C12H17NO6 | 294.096 |
|                   | C13H20O6  | 295.116 |
|                   | C10H10O9  | 297.022 |
|                   | C12H21NO6 | 298.127 |
|                   | C14H23NO5 | 308.148 |
|                   | C14H25NO5 | 310.163 |
| <b>MABB_TRANS</b> |           |         |
|                   | C12H16O6  | 279.085 |
|                   | C13H20O5  | 279.121 |
|                   | C11H23NO7 | 304.138 |
|                   | C14H18O7  | 321.095 |
|                   | C13H18O8  | 325.09  |
| <b>MABB_HIGH</b>  |           |         |
|                   | C6H6O5    | 181.012 |
|                   | C5H7NO5   | 184.022 |
|                   | C6H6O6    | 197.006 |
|                   | C6H8O6    | 199.022 |
|                   | C5H6O7    | 201.001 |
|                   | C8H10O5   | 209.043 |
|                   | C7H9NO5   | 210.038 |
|                   | C9H8O5    | 219.027 |
|                   | C8H6O6    | 221.006 |
|                   | C9H10O5   | 221.043 |
|                   | C8H9NO5   | 222.038 |
|                   | C9H12O5   | 223.059 |
|                   | C8H10O6   | 225.038 |
|                   | C7H8O7    | 227.017 |
|                   | C7H10O7   | 229.033 |
|                   | C6H9NO7   | 230.028 |
|                   | C10H8O5   | 231.027 |
|                   | C9H7NO5   | 232.022 |
|                   | C10H10O5  | 233.043 |
|                   | C9H9NO5   | 234.038 |

|  |           |         |
|--|-----------|---------|
|  | C10H12O5  | 235.059 |
|  | C9H11NO5  | 236.054 |
|  | C9H10O6   | 237.038 |
|  | C8H9NO6   | 238.033 |
|  | C8H8O7    | 239.017 |
|  | C8H11NO6  | 240.049 |
|  | C8H10O7   | 241.033 |
|  | C8H12O7   | 243.048 |
|  | C7H11NO7  | 244.044 |
|  | C11H10O5  | 245.043 |
|  | C10H9NO5  | 246.038 |
|  | C10H8O6   | 247.022 |
|  | C11H12O5  | 247.059 |
|  | C10H10O6  | 249.038 |
|  | C9H10O7   | 253.033 |
|  | C9H14O7   | 257.064 |
|  | C12H12O5  | 259.059 |
|  | C11H11NO5 | 260.054 |
|  | C9H10O8   | 269.028 |
|  | C9H13NO7  | 270.059 |
|  | C9H12O8   | 271.043 |
|  | C9H15NO7  | 272.075 |
|  | C12H10O6  | 273.038 |
|  | C12H12O6  | 275.053 |
|  | C10H12O8  | 283.043 |
|  | C9H11NO8  | 284.038 |
|  | C10H17NO7 | 286.091 |
|  | C12H8O7   | 287.017 |
|  | C14H16O5  | 287.09  |
|  | C13H15NO5 | 288.085 |
|  | C12H10O7  | 289.033 |
|  | C11H9NO7  | 290.028 |
|  | C13H16O6  | 291.085 |
|  | C11H15NO7 | 296.075 |

|             |           |         |  |  |          |         |
|-------------|-----------|---------|--|--|----------|---------|
|             | C10H15NO8 | 300.07  |  |  |          |         |
|             | C13H14O7  | 305.064 |  |  | C6H9NO2  | 150.053 |
|             | C12H12O8  | 307.043 |  |  | C6H11NO2 | 152.069 |
|             | C12H14O8  | 309.059 |  |  | C7H4O3   | 159.006 |
|             | C14H22O6  | 309.132 |  |  | C6H2O4   | 160.985 |
|             | C11H14O9  | 313.054 |  |  | C4H10O5  | 161.043 |
|             | C11H17NO8 | 314.085 |  |  | C7H8O3   | 163.037 |
|             | C13H17NO7 | 322.091 |  |  | C6H7NO3  | 164.033 |
|             | C14H12O8  | 331.043 |  |  | C7H11NO2 | 164.069 |
|             | C15H19NO6 | 332.111 |  |  | C7H10O3  | 165.053 |
|             | C14H16O8  | 335.075 |  |  | C7H7NO3  | 176.033 |
|             | C15H14O8  | 345.059 |  |  | C7H6O4   | 177.017 |
|             | C20H26O4  | 353.173 |  |  | C8H10O3  | 177.053 |
|             | C22H30O3  | 365.21  |  |  | C9H14O2  | 177.089 |
|             | C19H23NO5 | 368.148 |  |  | C7H9NO3  | 178.048 |
|             | C19H22O6  | 369.132 |  |  | C8H13NO2 | 178.085 |
|             | C18H20O7  | 371.111 |  |  | C8H12O3  | 179.069 |
|             |           |         |  |  | C8H8O4   | 191.032 |
| <b>SOA1</b> |           |         |  |  | C9H12O3  | 191.069 |
|             | C8H14O4   | 197.079 |  |  | C10H16O2 | 191.105 |
|             | C9H15NO3  | 208.095 |  |  | C8H11NO3 | 192.064 |
|             | C9H14O4   | 209.079 |  |  | C10H19NO | 192.137 |
|             | C8H13NO4  | 210.075 |  |  | C9H14O3  | 193.084 |
|             | C9H17NO3  | 210.111 |  |  | C10H18O2 | 193.121 |
|             | C9H16O4   | 211.095 |  |  | C7H9NO4  | 194.043 |
|             | C10H16O4  | 223.095 |  |  | C9H17NO2 | 194.116 |
|             | C9H15NO4  | 224.09  |  |  | C9H16O3  | 195.1   |
|             | C10H20O4  | 227.126 |  |  | C6H7NO5  | 196.022 |
|             | C10H16O5  | 239.09  |  |  | C9H10O4  | 205.048 |
|             | C10H18O5  | 241.105 |  |  | C10H14O3 | 205.084 |
|             | C12H22O4  | 253.142 |  |  | C8H8O5   | 207.027 |
|             | C12H24O4  | 255.158 |  |  | C10H16O3 | 207.1   |
|             | C14H25NO4 | 294.168 |  |  | C10H18O3 | 209.116 |
|             | C17H30O4  | 321.205 |  |  | C7H14O6  | 217.069 |
|             | C16H31NO5 | 340.21  |  |  |          |         |

|           |         |
|-----------|---------|
| C8H8O6    | 223.022 |
| C10H18O4  | 225.111 |
| C7H9NO6   | 226.033 |
| C9H17NO4  | 226.106 |
| C9H16O5   | 227.09  |
| C9H18O5   | 229.105 |
| C13H25NO  | 234.184 |
| C9H12O6   | 239.053 |
| C10H6O6   | 245.006 |
| C9H5O7    | 247.994 |
| C10H12O6  | 251.053 |
| C9H11NO6  | 252.049 |
| C9H12O7   | 255.048 |
| C10H18O6  | 257.1   |
| C11H8O6   | 259.022 |
| C10H12O7  | 267.048 |
| C11H10O7  | 277.033 |
| C11H14O7  | 281.064 |
| C13H12O6  | 287.053 |
| C12H12O7  | 291.048 |
| C15H24O4  | 291.158 |
| C12H14O7  | 293.064 |
| C15H26O4  | 293.173 |
| C11H14O8  | 297.059 |
| C10H14O9  | 301.054 |
| C9H13NO9  | 302.049 |
| C10H17NO8 | 302.085 |
| C9H12O10  | 303.033 |
| C11H20O8  | 303.106 |
| C15H22O5  | 305.137 |
| C13H16O7  | 307.08  |
| C14H15NO6 | 316.08  |
| C13H14O8  | 321.059 |
| C17H22O5  | 329.137 |

|             |         |
|-------------|---------|
| C19H30O3    | 329.21  |
| C15H18O7    | 333.095 |
| C17H26O5    | 333.168 |
| C16H24O6    | 335.147 |
| C14H18O8    | 337.09  |
| C17H30O5    | 337.199 |
| C13H17NO8   | 338.085 |
| C16H14O7    | 341.064 |
| C16H17NO6   | 342.096 |
| C14H11NO8   | 344.038 |
| C17H26O6    | 349.163 |
| C18H32O5    | 351.215 |
| C15H23NO7   | 352.138 |
| C17H21NO6   | 358.127 |
| C18H26O6    | 361.163 |
| C19H20O6    | 367.116 |
| C18H7O8     | 374.004 |
| C19H31NO5   | 376.21  |
| C16H18O9    | 377.085 |
| C15H16O10   | 379.064 |
| C18H28O7    | 379.174 |
| C14H17NO10  | 382.075 |
| C19H20O7    | 383.111 |
| C20H27NO5   | 384.179 |
| C21H34O5    | 389.231 |
| C20H33NO5   | 390.226 |
| C20H32O6    | 391.21  |
| C17H23NO8   | 392.132 |
| C19H30O7    | 393.189 |
| C16H21NO9   | 394.112 |
| <b>NSOA</b> |         |
| C7H13NO     | 150.09  |
| C6H8O3      | 151.037 |
| C7H12O2     | 151.074 |

|           |         |
|-----------|---------|
| C6H10O3   | 153.053 |
| C7H6O3    | 161.022 |
| C7H12O3   | 167.069 |
| C7H4O4    | 175.001 |
| C6H5NO4   | 178.012 |
| C9H15NO2  | 192.1   |
| C5H7NO6   | 200.017 |
| C8H9NO4   | 206.043 |
| C8H11NO4  | 208.059 |
| C9H7NO4   | 216.028 |
| C9H11NO4  | 220.059 |
| C9H13NO4  | 222.075 |
| C8H11NO5  | 224.054 |
| C8H13NO5  | 226.069 |
| C8H15NO5  | 228.085 |
| C12H19NO2 | 232.132 |
| C10H13NO4 | 234.075 |
| C12H21NO2 | 234.147 |
| C10H15NO4 | 236.09  |
| C11H19NO3 | 236.127 |
| C9H13NO5  | 238.069 |
| C10H17NO4 | 238.106 |
| C9H15NO5  | 240.085 |
| C7H9NO7   | 242.028 |
| C8H15NO6  | 244.08  |
| C12H17NO3 | 246.111 |
| C10H11NO5 | 248.054 |
| C11H15NO4 | 248.09  |
| C12H19NO3 | 248.127 |
| C12H18O4  | 249.111 |
| C10H13NO5 | 250.069 |
| C11H17NO4 | 250.106 |
| C9H8O7    | 251.017 |
| C10H15NO5 | 252.085 |

|           |         |
|-----------|---------|
| C11H19NO4 | 252.121 |
| C9H15NO6  | 256.08  |
| C9H17NO6  | 258.096 |
| C10H21NO5 | 258.132 |
| C12H15NO4 | 260.09  |
| C10H22O6  | 261.132 |
| C10H13NO6 | 266.064 |
| C12H20O5  | 267.121 |
| C10H15NO6 | 268.08  |
| C11H19NO5 | 268.116 |
| C8H11NO8  | 272.038 |
| C10H19NO6 | 272.111 |
| C14H20O4  | 275.126 |
| C12H15NO5 | 276.085 |
| C13H19NO4 | 276.121 |
| C11H15NO6 | 280.08  |
| C12H19NO5 | 280.116 |
| C13H22O5  | 281.137 |
| C10H13NO7 | 282.059 |
| C11H17NO6 | 282.096 |
| C12H21NO5 | 282.132 |
| C11H19NO6 | 284.111 |
| C12H23NO5 | 284.148 |
| C12H22O6  | 285.132 |
| C12H11NO6 | 288.049 |
| C14H19NO4 | 288.121 |
| C12H13NO6 | 290.064 |
| C13H17NO5 | 290.101 |
| C14H21NO4 | 290.137 |
| C12H15NO6 | 292.08  |
| C11H13NO7 | 294.059 |
| C13H21NO5 | 294.132 |
| C12H16O7  | 295.08  |
| C14H24O5  | 295.152 |



|           |         |
|-----------|---------|
| C10H11NO8 | 296.038 |
| C12H19NO6 | 296.111 |
| C11H17NO7 | 298.091 |
| C9H11NO9  | 300.033 |
| C11H19NO7 | 300.106 |
| C14H31NO4 | 300.215 |
| C12H25NO6 | 302.158 |
| C13H28O6  | 303.179 |
| C9H15NO9  | 304.065 |
| C10H19NO8 | 304.101 |
| C13H17NO6 | 306.096 |
| C13H19NO6 | 308.111 |
| C12H17NO7 | 310.091 |
| C13H21NO6 | 310.127 |
| C11H12O9  | 311.038 |
| C10H11NO9 | 312.033 |
| C12H19NO7 | 312.106 |
| C13H23NO6 | 312.143 |
| C10H10O10 | 313.017 |
| C13H22O7  | 313.127 |
| C12H21NO7 | 314.122 |
| C13H25NO6 | 314.158 |
| C14H29NO5 | 314.195 |
| C15H19NO5 | 316.116 |
| C14H14O7  | 317.064 |
| C16H25NO4 | 318.168 |
| C13H15NO7 | 320.075 |
| C15H23NO5 | 320.148 |
| C14H21NO6 | 322.127 |
| C15H24O6  | 323.147 |
| C11H11NO9 | 324.033 |
| C13H19NO7 | 324.106 |
| C14H23NO6 | 324.143 |
| C16H29O5  | 324.192 |

|           |         |
|-----------|---------|
| C12H14O9  | 325.054 |
| C12H17NO8 | 326.085 |
| C15H29NO5 | 326.195 |
| C16H16O6  | 327.085 |
| C17H23NO4 | 328.153 |
| C14H13NO7 | 330.059 |
| C16H21NO5 | 330.132 |
| C14H17NO7 | 334.091 |
| C13H15NO8 | 336.07  |
| C15H23NO6 | 336.143 |
| C16H27NO5 | 336.179 |
| C14H21NO7 | 338.122 |
| C16H29NO5 | 338.195 |
| C13H19NO8 | 340.101 |
| C15H27NO6 | 340.174 |
| C16H16O7  | 343.08  |
| C16H19NO6 | 344.111 |
| C18H27NO4 | 344.184 |
| C17H22O6  | 345.132 |
| C17H25NO5 | 346.163 |
| C15H19NO7 | 348.106 |
| C17H27NO5 | 348.179 |
| C16H25NO6 | 350.158 |
| C14H16O9  | 351.069 |
| C16H24O7  | 351.142 |
| C14H19NO8 | 352.101 |
| C16H27NO6 | 352.174 |
| C18H21NO5 | 354.132 |
| C21H19NO3 | 356.127 |
| C20H31NO3 | 356.221 |
| C20H30O4  | 357.205 |
| C16H17NO7 | 358.091 |
| C18H25NO5 | 358.163 |
| C20H23NO4 | 364.153 |

|            |         |
|------------|---------|
| C19H18O6   | 365.1   |
| C21H29NO3  | 366.205 |
| C23H37NO   | 366.278 |
| C21H31NO3  | 368.221 |
| C20H26O5   | 369.168 |
| C22H34O3   | 369.241 |
| C18H21NO6  | 370.127 |
| C20H29NO4  | 370.2   |
| C22H37NO2  | 370.273 |
| C20H28O5   | 371.184 |
| C20H15NO5  | 372.085 |
| C15H27NO8  | 372.164 |
| C21H35NO3  | 372.252 |
| C17H18O8   | 373.09  |
| C19H26O6   | 373.163 |
| C17H21NO7  | 374.122 |
| C18H25NO6  | 374.158 |
| C17H20O8   | 375.106 |
| C19H28O6   | 375.179 |
| C18H27NO6  | 376.174 |
| C18H26O7   | 377.158 |
| C15H17NO9  | 378.08  |
| C17H25NO7  | 378.153 |
| C19H35NO5  | 380.242 |
| C16H25NO8  | 382.148 |
| C22H21NO4  | 386.137 |
| C24H29NO2  | 386.21  |
| C18H20O8   | 387.106 |
| C19H26O7   | 389.158 |
| C16H17NO9  | 390.08  |
| C16H16O10  | 391.064 |
| C15H15NO10 | 392.06  |
| C19H31NO6  | 392.205 |
| C19H33NO6  | 394.221 |
| C22H28O5   | 395.184 |
| C21H27NO5  | 396.179 |
| C19H18O8   | 397.09  |
| C20H25NO6  | 398.158 |
| C22H33NO4  | 398.231 |
| C19H23NO7  | 400.138 |
| C21H31NO5  | 400.21  |

Stefenelli, G., Pospisilova, V., Lopez-Hilfiker, F. D., Daellenbach, K. R., Hüglin, C., Tong, Y., Baltensperger, U., Prevot, A. S. H., and Slowik, J. G.: Organic aerosol source apportionment in Zurich using extractive electrospray ionization time-of-flight mass spectrometry (EESI-TOF): Part I, biogenic influences and day/night chemistry in summer, Atmospheric Chemistry and Physics Discussions, 1-36, 10.5194/acp-2019-361, 2019.
